# Supplementary material for: The miRNA Transcriptome Directly Reflects the Physiological and Biochemical Differences between Red, White, and Intermediate Muscle Fiber Types
Source: MDPI journal article supplement (doi:10.3390/ijms16059635), 2015-04-29
Supplement: s1 [file s1]

## Supplementary Information

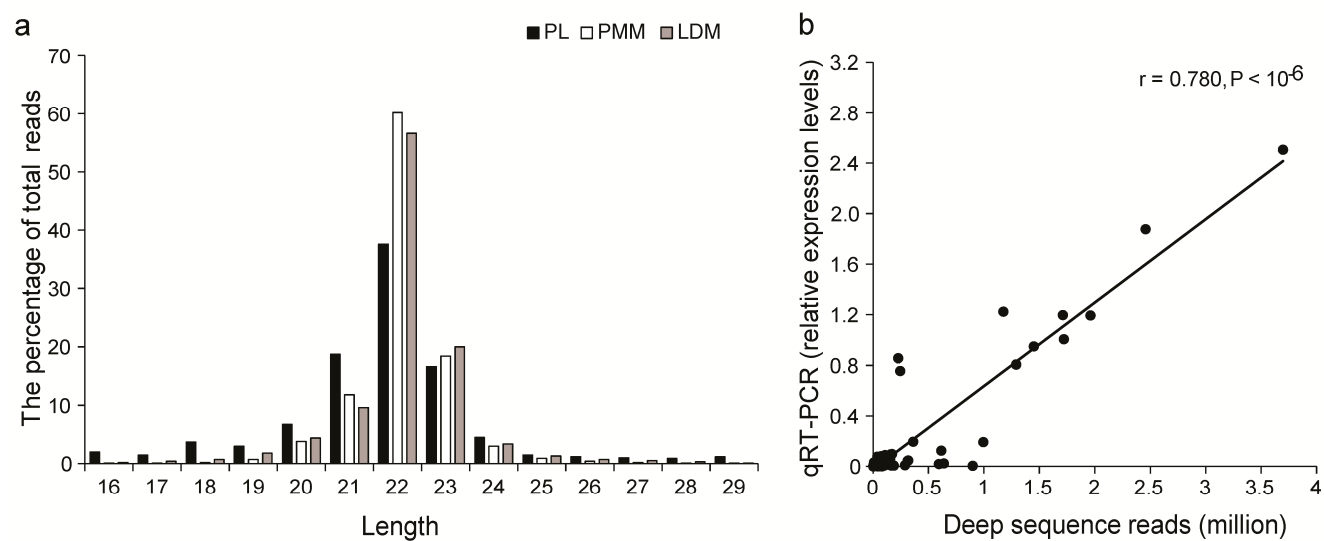

**Figure S1.** (a) Length distribution of the mappable reads; (b) q-PCR validation for a randomly selected set of 20 miRNAs. Pearson's correlation was used to determine the relationship between the q-PCR and small RNA-seq results for miRNA expression levels.

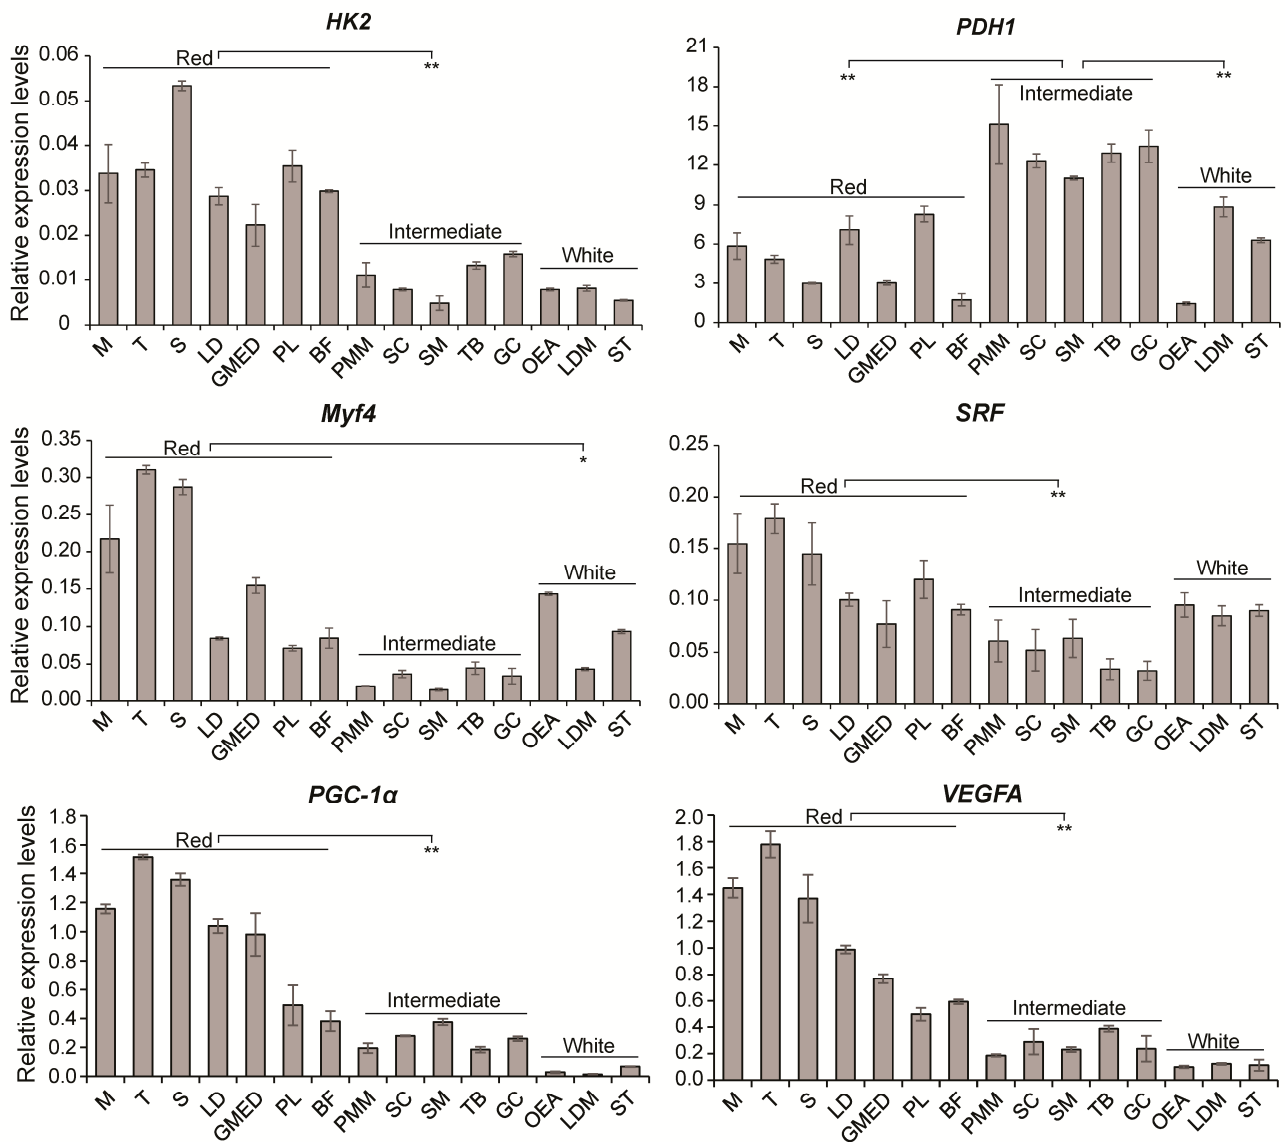

**Figure S2.** The expression profiling of marker genes for metabolic pathways (*HK2* and *PDH1*), myogenesis (*Myf4* and *SRF*) and angiogenesis (*PGC-1 $\alpha$*  and *VEGFA*) across distinct muscle tissues. Data are means  $\pm$  SD. Statistical significance was calculated by one-way repeated-measures analysis of variance. \*  $p < 0.05$ , \*\*  $p < 0.001$ .

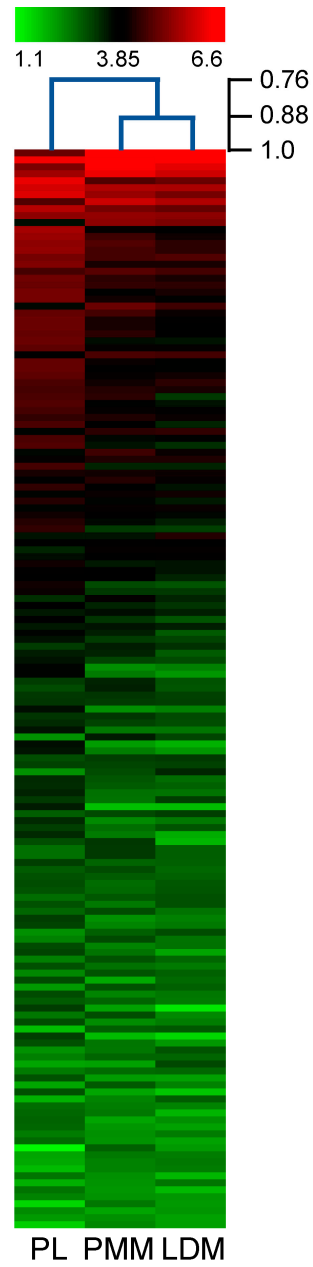

**Figure S3.** Hierarchical clustering analysis for three muscle types based on the expression of 365 Known porcine miRNAs.

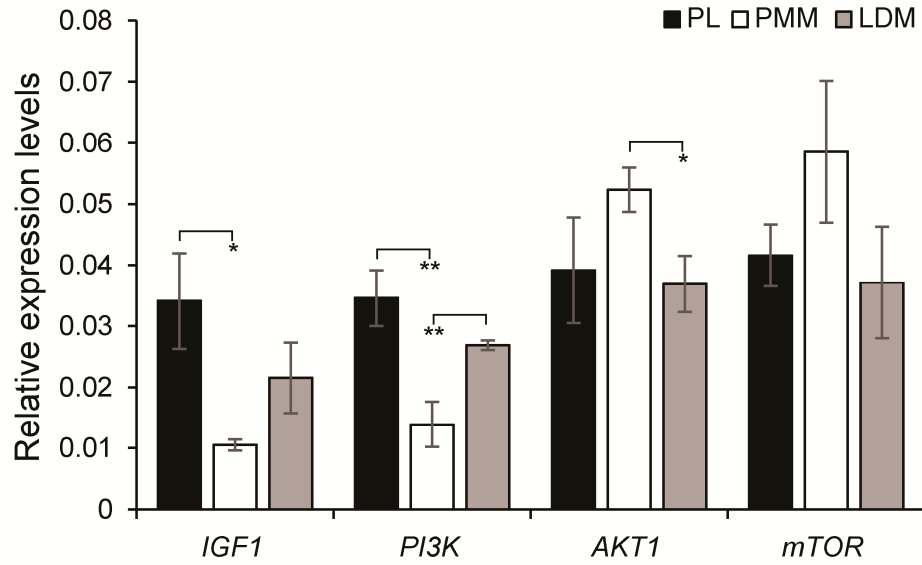

**Figure S4.** The relative expression levels of four insulin signaling pathway marker genes across three distinct muscle types. Data are means  $\pm$  SD. Statistical significance was calculated by one-way repeated-measures analysis of variance. \*  $p < 0.05$ , \*\*  $p < 0.001$ .

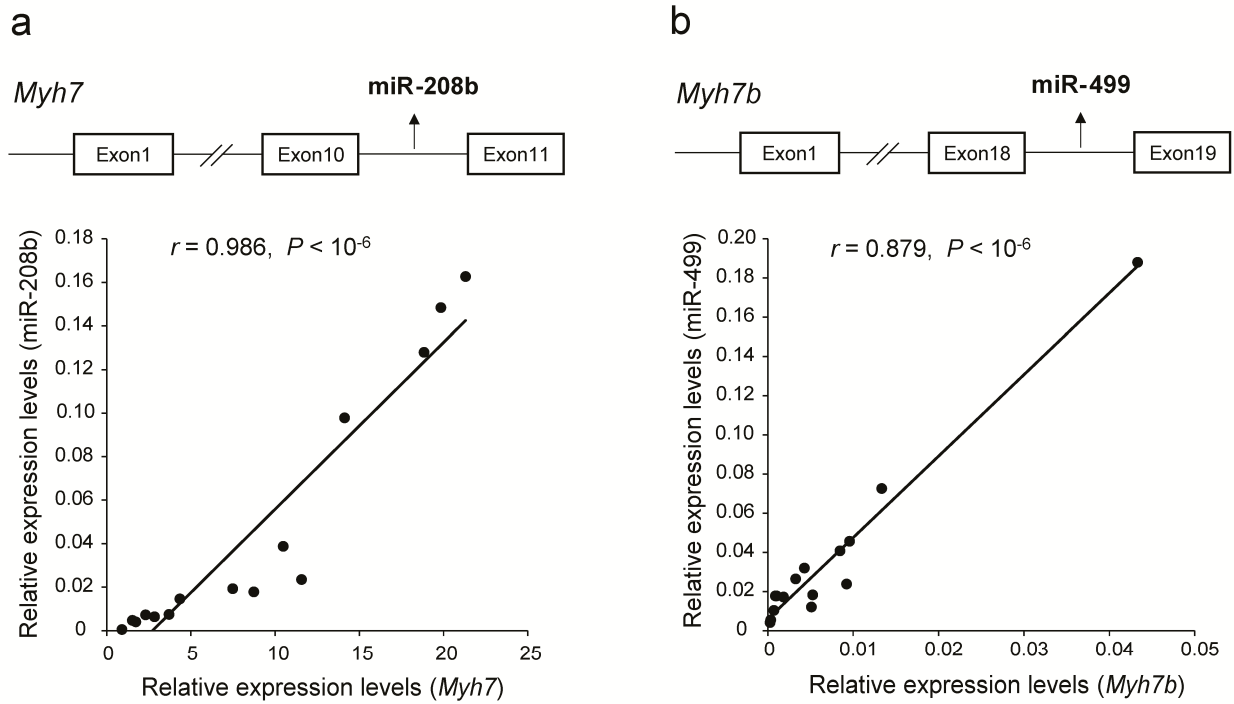

**Figure S5.** (a) The genomic relationship and expression correlation between miR-208b and its host gene, *Myh7*; (b) The genomic relationship and expression correlation between miR-499 and its host gene, *Myh7b*.
