# Supplementary material for: The miRNA Transcriptome Directly Reflects the Physiological and Biochemical Differences between Red, White, and Intermediate Muscle Fiber Types
Source: MDPI journal article supplement (doi:10.3390/ijms16059635), 2015-04-29
Supplement: s1 [file s1]

## Supplementary Information

**Table S6.** Target information of DE miRNAs gathered from previous reports and bioinformatic prediction.

| No. | miRNA Name          | PL up Fold Change |            | Target Genes or Pathways                      |
|-----|---------------------|-------------------|------------|-----------------------------------------------|
|     |                     | GC vs. LDM        | GC vs. PMM |                                               |
| 1   | ssc-miR-26a-5p      | 16.67             | 26.05      | Ezh2 [71], (Smad1,Smad4) [72]                 |
| 2   | ssc-let-7a-1/2-5p   | 5.74              | 3.81       | Predicted                                     |
| 3   | ssc-miR-99a-5p      | 37.65             | 25.46      | mTOR [73]                                     |
| 4   | ssc-miR-199a-1/2-5p | 15.25             | 6.23       | (Hif-1 $\alpha$ , Sirt1) [74]                 |
| 5   | ssc-miR-30e-5p      | 7.91              | 4.81       | Ubc9 [75], UCP2 [76]                          |
| 6   | ssc-miR-24-1/2-3p   | 7.58              | 3.89       | promotes skeletal muscle differentiation [77] |
| 7   | ssc-miR-191-5p      | 7.88              | 7.91       | Predicted                                     |
| 8   | ssc-miR-151-5p      | 6.49              | 15.91      | Predicted                                     |
| 9   | ssc-miR-133b-3p     | 2.09              | 2.50       | Prdm16 [78]                                   |
| 10  | ssc-miR-27a-3p      | 15.75             | 7.16       | Pax3 [29], myostatin [79–81]                  |
| 11  | ssc-let-7g-5p       | 5.35              | 3.94       | Predicted                                     |
| 12  | ssc-miR-100-5p      | 23.19             | 18.71      | FGFR3 [82]                                    |
| 13  | ssc-let-7i-5p       | 10.11             | 5.10       | Predicted                                     |
| 14  | ssc-miR-126-3p      | 8.70              | 5.15       | IRS-1 [83], Spred-1 [54], VCAM-1 [84]         |
| 15  | ssc-miR-30c-1/2-5p  | 3.19              | 2.80       | Predicted                                     |
| 16  | ssc-miR-10a-5p      | 10.39             | 3.19       | HDAC4 [85]                                    |
| 17  | ssc-miR-125a-5p     | 10.98             | 9.46       | Predicted                                     |
| 18  | ssc-miR-23a-3p      | 10.10             | 5.57       | (MAFbx/atrogen-1, MuRF1) [86], Myh1/2/4 [44]  |
| 19  | ssc-miR-30a-5p      | 5.23              | 1.79       | PRDM1 [45], DLL4 [87]                         |
| 20  | ssc-miR-125b-1-5p   | 6.49              | 5.86       | IGF-II [88]                                   |
| 21  | ssc-miR-30b-5p      | 4.03              | 5.20       | DLL4 [89]                                     |
| 22  | ssc-miR-374a-5p     | 12.03             | 7.72       | Predicted                                     |
| 23  | ssc-miR-199a-1/2-3p | 21.57             | 12.26      | (Hif-1 $\alpha$ , Sirt1) [74]                 |
| 24  | ssc-miR-126-5p      | 15.65             | 4.71       | IRS-1 [83], Spred-1 [54], VCAM-1 [84]         |
| 25  | ssc-miR-181a-1/2-5p | 1.80              | 3.34       | Hox-A11 [90]                                  |
| 26  | ssc-miR-499-5p      | 24.08             | 1.91       | (Thrap1, Sox6 and Purb) [43]                  |
| 27  | ssc-miR-486-2-5p    | 6.25              | 8.65       | (PTEN , Foxo1a) [91], Pax7 [92]               |
| 28  | ssc-miR-30d-5p      | 2.60              | 2.04       | RUNX2 [93]                                    |
| 29  | ssc-miR-23b-3p      | 4.14              | 3.43       | Smad3 [94]                                    |
| 30  | ssc-miR-128-2-3p    | 14.34             | 14.67      | IRS1/Akt [95]                                 |
| 31  | ssc-miR-99b-5p      | 16.74             | 15.65      | TNF- $\alpha$ [96], mTOR [97]                 |
| 32  | ssc-let-7c-5p       | 6.30              | 2.90       | IGF1R [98]                                    |
| 33  | ssc-let-7d-5p       | 6.85              | 4.43       | Predicted                                     |
| 34  | ssc-miR-208b-3p     | 6.11              | 3.51       | sox6 [43]                                     |
| 35  | ssc-miR-1271-5p     | 15.57             | 13.58      | Predicted                                     |
| 36  | ssc-miR-98-5p       | 3.65              | 3.87       | cyclin D2 [99]                                |
| 37  | ssc-let-7e-5p       | 7.40              | 7.06       | Predicted                                     |



Table S6. *Cont.*

| No. | miRNA Name         | PMM up Fold Change |             | Target Genes or Pathways                                 |
|-----|--------------------|--------------------|-------------|----------------------------------------------------------|
|     |                    | PMM vs. LDM        | PMM vs. PL  |                                                          |
| 1   | ssc-miR-378-1/2-3p | 1.73               | 15.83       | MyoR [100], (BMP2, MAPK1) [101],<br>PGC-1 $\alpha$ [102] |
| 2   | ssc-miR-148a-3p    | 1.98               | 14.61       | ROCK1 [103]                                              |
| 3   | ssc-miR-101-1/2-3p | 2.56               | 16.64       | EZH2 [104]                                               |
| 4   | ssc-miR-381-3p     | 2.77               | 6.54        | Metabolic pathways (Table S7.1) [23]                     |
| 5   | ssc-miR-30e-3p     | 1.80               | 2.00        | Ubc9 [75], UCP2 [105]                                    |
| No. | miRNA Name         | LDM up Fold Change |             | Target Genes or Pathways                                 |
|     |                    | LDM vs. PMM        | LDM vs. PMM |                                                          |
| 1   | ssc-miR-1-3p       | 1.50               | 51.48       | (HDAC4, SRF) [21], MSTN [106] <i>etc.</i>                |
| 2   | ssc-miR-885-5p     | 4.90               | 5.34        | related to skeletal development [10]                     |
